# Supplementary material
Source: HighWire-hosted journal article supplement (https://bmjopen.bmj.com/content/10/9/e036342)
Supplement: inline-supplementary-material-1 [file inline-supplementary-material-1.pdf]

**Table 1.** Definitions of patient characteristics

| Data                              | Definitions                                                                                                                               |
|-----------------------------------|-------------------------------------------------------------------------------------------------------------------------------------------|
| Demographic data                  | Age ( $\geq 65$ years*)                                                                                                                   |
| Severity criteria *               | WBC $> 15$ G/l or serum creatinine $> 133$ $\mu\text{mol/L}$ <sup>1</sup>                                                                 |
| Radiologic sign of colitis *      | Abdominal computed tomography (CT) scanner with signs of colitis <sup>2</sup> performed $< 48$ h before and $< 10$ days after test result |
| Obesity                           | Body mass index $\geq 30$ <sup>3</sup>                                                                                                    |
| Chronic renal insufficiency       | Creatinine clearance $< 60\text{ml/min}$ <sup>4</sup>                                                                                     |
| History of hospitalisation *      | $\geq 48$ h $\leq 12$ weeks before prescription <sup>5</sup>                                                                              |
| History of CDI *                  | All patients with a history of positive test results (NAAT+ or EIA+ or TC+) who had received a treatment for CDI <sup>6</sup>             |
| History of antibiotic treatment * | $\geq 48$ h $\leq 4$ weeks before prescription <sup>7</sup>                                                                               |
| Ongoing PPI treatment *           | Any ongoing PPI treatment at the moment of the prescription <sup>8</sup>                                                                  |
| Immunosuppression *               | Chemotherapy $\leq 60$ days before prescription; SOT, HSCT, steroid <sup>9-12</sup>                                                       |
| Treatment course for CDI          | Introduced $< 48$ h before test results with a duration of $\geq 10$ days <sup>2</sup>                                                    |

\* Patient characteristics selected for univariate and multivariate analysis

<sup>1</sup> At least 20 mg/d (prednisone or equivalent) during  $\geq 4$  weeks before prescription

<sup>2</sup> Or still under treatment at time of death

Abbreviations: CDI: *C. difficile* infection; WBC: white blood count; NAAT: nucleic acid amplification test for toxin B gene; EIA: enzyme immunoassay for toxin A/B; TC: toxigenic culture; PPI: proton pump inhibitor; SOT: solid organ transplant; HSCT: hematopoietic stem cell transplant.

## References

- McDonald LC, Gerding DN, Johnson S, et al. Clinical Practice Guidelines for Clostridium difficile Infection in Adults and Children: 2017 Update by the Infectious Diseases Society of America (IDSA) and Society for Healthcare Epidemiology of America (SHEA). *Clin Infect Dis* 2018;66(7):e1-e48. doi: 10.1093/cid/cix1085
- Kirkpatrick ID, Greenberg HM. Evaluating the CT diagnosis of Clostridium difficile colitis: should CT guide therapy? *AJR Am J Roentgenol* 2001;176(3):635-9. doi: 10.2214/ajr.176.3.1760635 [published Online First: 2001/02/27]
- Bishara J, Farah R, Mograbi J, et al. Obesity as a risk factor for Clostridium difficile infection. *Clin Infect Dis* 2013;57(4):489-93. doi: 10.1093/cid/cit280 [published Online First: 2013/05/07]
- Eddi R, Malik MN, Shakov R, et al. Chronic kidney disease as a risk factor for Clostridium difficile infection. *Nephrology (Carlton)* 2010;15(4):471-5. doi: 10.1111/j.1440-1797.2009.01274.x [published Online First: 2010/07/09]
- Lubbert C, John E, von Muller L. Clostridium difficile infection: guideline-based diagnosis and treatment. *Dtsch Arztebl Int* 2014;111(43):723-31. doi: 10.3238/arztebl.2014.0723 [published Online First: 2014/11/19]

6. Shivashankar R, Khanna S, Kammer PP, et al. Clinical Predictors of Recurrent Clostridium difficile Infection in Outpatients. *Aliment Pharmacol Ther* 2014;40(5):518-22. doi: 10.1111/apt.12864
7. Hensgens MP, Goorhuis A, Dekkers OM, et al. Time interval of increased risk for Clostridium difficile infection after exposure to antibiotics. *J Antimicrob Chemother* 2012;67(3):742-8. doi: 10.1093/jac/dkr508 [published Online First: 2011/12/08]
8. Trifan A, Stanciu C, Girleanu I, et al. Proton pump inhibitors therapy and risk of Clostridium difficile infection: Systematic review and meta-analysis. *World J Gastroenterol* 2017;23(35):6500-15. doi: 10.3748/wjg.v23.i35.6500
9. Aldrete SD, Kraft CS, Magee MJ, et al. Risk factors and epidemiology of Clostridium difficile infection in hematopoietic stem cell transplant recipients during the peritransplant period. *Transpl Infect Dis* 2017;19(1) doi: 10.1111/tid.12649 [published Online First: 2016/12/13]
10. Raza S, Baig MA, Russell H, et al. Clostridium difficile infection following chemotherapy. *Recent Pat Antiinfect Drug Discov* 2010;5(1):1-9. [published Online First: 2009/11/26]
11. Neemann K, Freifeld A. Clostridium difficile-Associated Diarrhea in the Oncology Patient. *J Oncol Pract* 2017;13(1):25-30. doi: 10.1200/jop.2016.018614 [published Online First: 2017/01/14]
12. Riddle DJ, Dubberke ER. Clostridium difficile infection in solid organ transplant recipients. *Curr Opin Organ Transplant* 2008;13(6):592-600. doi: 10.1097/MOT.0b013e3283186b51 [published Online First: 2008/12/09]
